# Supplementary material for: Serum proteins may facilitate the identification of Kawasaki disease and promote in vitro neutrophil infiltration
Source: PubMed Central journal article supplement (PMC7518260; doi:10.1038/s41598-020-72695-z), 2020-09-24
Supplement: 41598_2020_72695_MOESM1_ESM.pdf [file 41598_2020_72695_MOESM1_ESM.pdf]

## **Serum proteins may facilitate the identification of Kawasaki disease and promote *in vitro* neutrophil infiltration**

Sung-Chou Li<sup>1,\*</sup>, Kuo-Wang Tsai<sup>2,\*</sup>, Lien-Hung Huang<sup>3,\*</sup>, Ken-Pen Weng<sup>4,5,6,#</sup>, Kuang-Jen Chien<sup>4</sup>, Yuyu Lin<sup>1</sup>, Chi-Ying Tu<sup>4</sup>, Pei-Hsien Lin<sup>1</sup>

1 Genomics and Proteomics Core Laboratory, Department of Medical Research, Kaohsiung Chang Gung Memorial Hospital and Chang Gung University College of Medicine, Kaohsiung, Taiwan

2 Department of Research, Taipei Tzu Chi Hospital, Buddhist Tzu Chi Medical Foundation, New Taipei, Taiwan

3 Department of Neurosurgery, Kaohsiung Chang Gung Memorial Hospital and Chang Gung University College of Medicine, Kaohsiung, Taiwan

4 Congenital Structural Heart Disease Center, Department of Pediatrics, Kaohsiung Veterans General Hospital, Kaohsiung, Taiwan

5 Department of Medicine, National Yang-Ming University, Taipei, Taiwan

6 Shu-Zen Junior College of Medicine and Management, Kaohsiung, Taiwan

\* Equal contribution

# Address requests for reprints/correspondence to:

Ken-Pen Weng: Congenital Structural Heart Disease Center, Department of Pediatrics, Kaohsiung Veterans General Hospital, Kaohsiung, No.386, Dazhong 1st Rd., Zuoying Dist., Kaohsiung, Taiwan, Tel: 011-886-7-346-8203, Fax: 011-886-7-346-8207

E-mail addresses: SCL: raymond.pinus@gmail.com; KWT: kwtsai6733@gmail.com; LHH: ahonbob@gmail.com; KPW: kenpenweng@yahoo.com.tw; KJC: kjchien@vghks.gov.tw; YL: linyuyu030@gmail.com; CYT: chiyingofficial@gmail.com; PHL:

jio4872@gmail.com;

**Running title:** S100A12's pathogenic roles in KD

**Supplementary Figure 1. Cytokine variations among different subjects and with IVIG administration.** To compare the cytokine variations, we integrated the data of Figure 1b and Figure 3 into Table 3. To provide a comprehensive comparison, we plotted the variations of three serum proteins. After three weeks of IVIG administration (convalescent set), the concentrations of S100A8, S100A9 and DEFA1 significantly declined even lower than those of the HC set (p-value= 1.223E-10, 2.418E-08 and 0.001 for S100A8, S100A9 and DEFA1, respectively). The sample sizes of the HC, FC KD, pre-IVIG, post-IVIG and convalescent sets are 37, 28, 78, 63, 63 and 63, respectively. Data were presented as the mean±SEM.

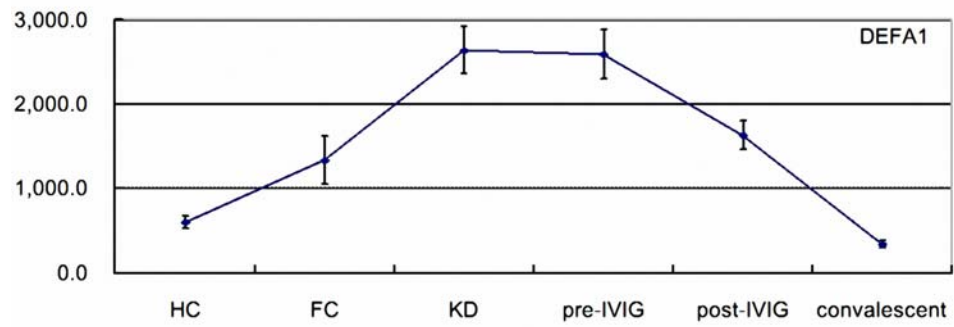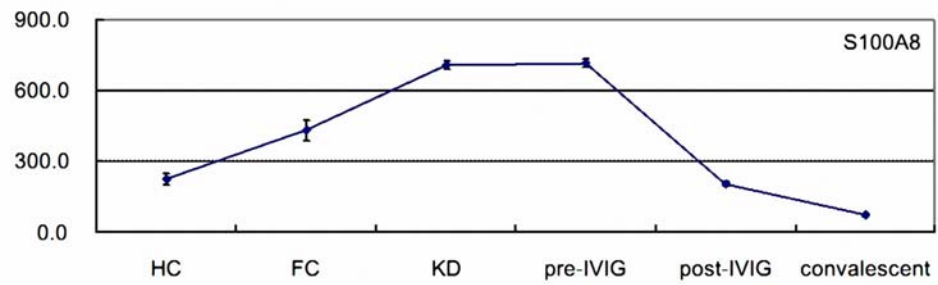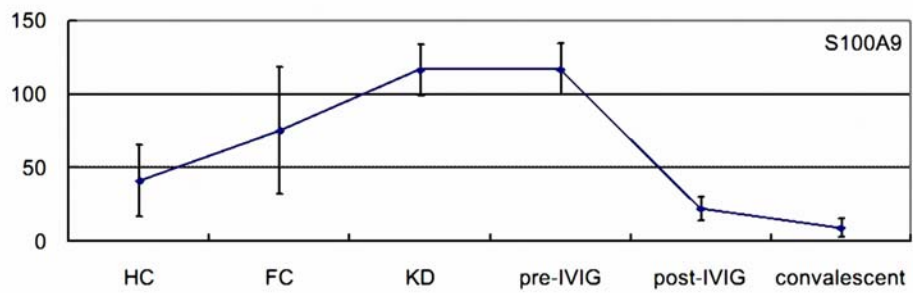

**Supplementary Table 1. The abundances of serum proteins quantified by iTRAQ.** We had two pooled FC and two pooled KD serum samples analyzed with iTRAQ. The abundances of these serum proteins were shown in this table.

| Accession | Exp. q-value | Coverage | # Protein Groups | # Peptides | # Unique Peptides | # PSMs | MW [kDa] | Abundances: 114-KD | Abundances: 115-FC | Abundances: 116-KD | Abundances: 117-FC |
|-----------|--------------|----------|------------------|------------|-------------------|--------|----------|--------------------|--------------------|--------------------|--------------------|
| P98160    | 0.0000E+00   | 0.9793   | 1                | 2          | 2                 | 2      | 468.5    | 6.6                | 11.1               | 11.8               | 13.7               |
| P59665    | 5.0000E-03   | 32.9787  | 1                | 1          | 1                 | 1      | 10.2     | 9.2                | 5.8                | 7.2                | 2.8                |
| Q6UWP8    | 5.0000E-03   | 9.1525   | 1                | 1          | 1                 | 2      | 60.5     | 9.6                | 11.9               | 10.6               | 12.8               |
| Q01518    | 6.0000E-03   | 3.3684   | 1                | 1          | 1                 | 1      | 51.9     | 12.9               | 9.2                | 7.2                | 8.6                |
| P00488    | 6.0000E-03   | 3.4153   | 1                | 1          | 1                 | 1      | 83.2     | 13.7               | 10.1               | 12.6               | 14.2               |
| P13716    | 3.0000E-03   | 5.7576   | 1                | 1          | 1                 | 1      | 36.3     | 13.8               | 12.1               | 10.9               | 12.6               |
| P06326    | 6.0000E-03   | 9.6000   | 1                | 1          | 1                 | 1      | 13.6     | 14.3               | 12                 | 10.7               | 12.1               |
| P60900    | 6.0000E-03   | 8.5366   | 1                | 2          | 2                 | 2      | 27.4     | 14.6               | 14.8               | 18.3               | 22.3               |
| Q15166    | 0.0000E+00   | 7.3446   | 1                | 3          | 1                 | 5      | 39.6     | 15.7               | 32.3               | 23                 | 22                 |
| Q9H4G4    | 6.0000E-03   | 11.0390  | 1                | 1          | 1                 | 1      | 17.2     | 16.2               | 13.4               | 25.4               | 18.6               |
| P02788    | 0.0000E+00   | 5.2113   | 1                | 3          | 3                 | 3      | 78.1     | 16.3               | 20                 | 20.5               | 19.5               |
| Q04721    | 6.0000E-03   | 0.8094   | 1                | 1          | 1                 | 1      | 265.2    | 16.7               | 14.6               | 16.5               | 13.4               |
| O75144    | 3.0000E-03   | 5.9603   | 1                | 1          | 1                 | 1      | 33.3     | 17.1               | 18.8               | 14                 | 15.4               |
| Q9Y490    | 3.0000E-03   | 0.9839   | 1                | 2          | 2                 | 2      | 269.6    | 17.9               | 19.2               | 25.4               | 28.2               |
| Q99497    | 6.0000E-03   | 4.7619   | 1                | 1          | 1                 | 1      | 19.9     | 18.1               | 26                 | 36.9               | 43.3               |
| Q6UY14    | 3.0000E-03   | 3.2588   | 1                | 2          | 2                 | 2      | 116.5    | 18.3               | 14.8               | 17.4               | 14.4               |

|        |            |         |   |    |   |    |       |      |      |      |      |
|--------|------------|---------|---|----|---|----|-------|------|------|------|------|
| P69892 | 0.0000E+00 | 89.7959 | 1 | 12 | 1 | 28 | 16.1  | 18.7 | 88.3 | 23.2 | 25.1 |
| P01625 | 3.0000E-03 | 28.9474 | 1 | 2  | 2 | 2  | 12.6  | 20.2 | 13.6 | 15   | 14   |
| Q16270 | 3.0000E-03 | 10.6383 | 1 | 2  | 2 | 2  | 29.1  | 20.7 | 27.2 | 26.9 | 22.7 |
| Q13228 | 0.0000E+00 | 10.5932 | 1 | 3  | 3 | 3  | 52.4  | 20.8 | 26.9 | 27.6 | 34   |
| P01593 | 3.0000E-03 | 16.6667 | 1 | 1  | 1 | 2  | 12    | 20.8 | 16.2 | 15.2 | 12.8 |
| Q9H4A9 | 3.0000E-03 | 5.7613  | 1 | 2  | 2 | 2  | 53.3  | 21   | 23.4 | 15.2 | 20.8 |
| Q9HCN6 | 3.0000E-03 | 7.9646  | 1 | 2  | 2 | 2  | 36.8  | 21.8 | 28.2 | 29.5 | 30.8 |
| Q13449 | 3.0000E-03 | 4.7337  | 1 | 1  | 1 | 1  | 37.4  | 22.1 | 21.2 | 19.6 | 14.5 |
| P18669 | 6.0000E-03 | 6.2992  | 1 | 1  | 1 | 1  | 28.8  | 22.7 | 19.2 | 19.4 | 17.7 |
| P62258 | 0.0000E+00 | 10.5882 | 1 | 2  | 1 | 2  | 29.2  | 22.8 | 29.8 | 32   | 39   |
| P12821 | 6.0000E-03 | 0.8423  | 1 | 1  | 1 | 1  | 149.6 | 22.9 | 36.7 | 29.3 | 33.7 |
| Q8NBP7 | 3.0000E-03 | 3.9017  | 1 | 2  | 2 | 2  | 74.2  | 23.3 | 25.3 | 31   | 27.6 |
| Q9Y6R7 | 6.0000E-03 | 0.7771  | 1 | 2  | 2 | 2  | 571.6 | 24.7 | 23.1 | 29.8 | 25.8 |
| Q12884 | 0.0000E+00 | 5.1316  | 1 | 3  | 2 | 5  | 87.7  | 25.8 | 29.3 | 24.9 | 27.1 |
| O95497 | 0.0000E+00 | 12.2807 | 1 | 4  | 4 | 4  | 57    | 27.1 | 27.1 | 26.1 | 32.6 |
| Q9HDC9 | 3.0000E-03 | 5.5288  | 1 | 2  | 2 | 2  | 46.5  | 27.3 | 21.9 | 22.6 | 21.6 |
| P05019 | 0.0000E+00 | 14.8718 | 1 | 2  | 2 | 4  | 21.8  | 27.6 | 46.1 | 38.3 | 47.4 |
| P05164 | 0.0000E+00 | 5.6376  | 1 | 3  | 3 | 3  | 83.8  | 27.6 | 25.3 | 24.3 | 18.9 |
| O00299 | 6.0000E-03 | 4.9793  | 1 | 1  | 1 | 1  | 26.9  | 27.6 | 28   | 28.1 | 32.5 |
| P22897 | 3.0000E-03 | 2.8846  | 1 | 4  | 4 | 4  | 165.9 | 28.1 | 29.7 | 32.3 | 26.8 |
| P03950 | 5.0000E-03 | 10.8844 | 1 | 2  | 2 | 2  | 16.5  | 28.2 | 38.2 | 34.3 | 43.4 |
| P08779 | 0.0000E+00 | 10.1480 | 1 | 6  | 2 | 6  | 51.2  | 28.6 | 18   | 26.1 | 11.1 |

|        |            |         |   |   |   |    |       |      |      |      |      |
|--------|------------|---------|---|---|---|----|-------|------|------|------|------|
| Q9NTU7 | 6.0000E-03 | 5.9701  | 1 | 1 | 1 | 1  | 21.8  | 30.1 | 35.3 | 31   | 43.6 |
| P12109 | 0.0000E+00 | 3.7938  | 1 | 3 | 3 | 3  | 108.5 | 30.3 | 42.3 | 32   | 42.4 |
| P11142 | 0.0000E+00 | 9.7523  | 1 | 5 | 3 | 6  | 70.9  | 31.1 | 31.9 | 35.9 | 43.5 |
| P01034 | 6.0000E-03 | 7.5342  | 1 | 1 | 1 | 1  | 15.8  | 31.8 | 24.9 | 24.1 | 35.3 |
| P02452 | 0.0000E+00 | 2.6639  | 1 | 3 | 3 | 3  | 138.9 | 32   | 41.4 | 28   | 58.6 |
| P35916 | 0.0000E+00 | 4.3287  | 1 | 3 | 3 | 3  | 152.7 | 32   | 30.3 | 32.4 | 28.8 |
| P10451 | 6.0000E-03 | 5.4140  | 1 | 1 | 1 | 1  | 35.4  | 32.6 | 33.2 | 36.8 | 30.7 |
| P10599 | 3.0000E-03 | 31.4286 | 1 | 3 | 3 | 3  | 11.7  | 32.7 | 27.6 | 33.4 | 40.2 |
| P07195 | 0.0000E+00 | 10.7784 | 1 | 3 | 2 | 4  | 36.6  | 33.2 | 43.4 | 34.5 | 40.6 |
| P68032 | 0.0000E+00 | 25.1989 | 1 | 8 | 1 | 25 | 42    | 33.5 | 27.7 | 42.7 | 33   |
| P67936 | 0.0000E+00 | 13.7097 | 1 | 4 | 3 | 5  | 28.5  | 33.5 | 32.1 | 51.9 | 50.4 |
| O14786 | 3.0000E-03 | 2.2752  | 1 | 2 | 2 | 2  | 103.1 | 34.4 | 39.1 | 47.5 | 46.9 |
| Q86U17 | 6.0000E-03 | 5.6872  | 1 | 2 | 2 | 2  | 47    | 34.8 | 31.9 | 34.1 | 39   |
| Q13201 | 0.0000E+00 | 4.8046  | 1 | 4 | 4 | 5  | 138   | 35.1 | 29.6 | 18.8 | 18   |
| P07942 | 0.0000E+00 | 3.4155  | 1 | 4 | 4 | 4  | 197.9 | 35.5 | 32.8 | 41.2 | 36.6 |
| P32942 | 6.0000E-03 | 3.2907  | 1 | 2 | 2 | 2  | 59.5  | 35.7 | 44.9 | 44.9 | 48.3 |
| P23528 | 0.0000E+00 | 25.9036 | 1 | 3 | 3 | 3  | 18.5  | 36.3 | 35.5 | 43.9 | 45.5 |
| P08294 | 0.0000E+00 | 22.5000 | 1 | 3 | 3 | 4  | 25.8  | 36.8 | 35.3 | 50   | 34.6 |
| Q14766 | 6.0000E-03 | 1.1040  | 1 | 2 | 2 | 2  | 186.7 | 36.9 | 45.1 | 60.6 | 50.4 |
| O00592 | 6.0000E-03 | 3.7634  | 1 | 2 | 2 | 2  | 58.6  | 37.5 | 49.6 | 34.4 | 40.6 |
| P09172 | 0.0000E+00 | 9.8865  | 1 | 4 | 4 | 6  | 69    | 38.2 | 50.2 | 42.9 | 41.5 |
| P54289 | 3.0000E-03 | 2.3572  | 1 | 3 | 3 | 3  | 124.5 | 38.3 | 47.6 | 43.5 | 47.3 |

|        |            |         |   |    |   |     |       |      |      |       |      |
|--------|------------|---------|---|----|---|-----|-------|------|------|-------|------|
| P63313 | 5.0000E-03 | 47.7273 | 1 | 2  | 1 | 2   | 5     | 38.5 | 41.7 | 40.9  | 29.5 |
| P01743 | 6.0000E-03 | 9.4017  | 1 | 1  | 1 | 1   | 12.9  | 39.6 | 28.4 | 22.1  | 25.5 |
| P62158 | 0.0000E+00 | 23.4899 | 1 | 2  | 2 | 2   | 16.8  | 39.9 | 39.4 | 63.9  | 53   |
| Q9H299 | 3.0000E-03 | 27.9570 | 1 | 2  | 2 | 2   | 10.4  | 40   | 53.9 | 59.3  | 48.5 |
| P99999 | 5.0000E-03 | 18.0952 | 1 | 2  | 2 | 2   | 11.7  | 40.4 | 48.6 | 40.7  | 49.9 |
| P81605 | 6.0000E-03 | 22.7273 | 1 | 2  | 2 | 2   | 11.3  | 40.7 | 85.4 | 45.7  | 50.1 |
| P07237 | 0.0000E+00 | 8.4646  | 1 | 3  | 3 | 3   | 57.1  | 40.9 | 36.9 | 40.2  | 41.3 |
| P15531 | 6.0000E-03 | 7.8947  | 1 | 1  | 1 | 1   | 17.1  | 41.1 | 63.3 | 62.2  | 71.3 |
| P29401 | 0.0000E+00 | 7.3836  | 1 | 4  | 4 | 4   | 67.8  | 41.4 | 44.1 | 51.8  | 36.4 |
| P78417 | 6.0000E-03 | 9.1286  | 1 | 2  | 2 | 2   | 27.5  | 41.6 | 40.9 | 43.6  | 49.3 |
| P69891 | 0.0000E+00 | 89.7959 | 1 | 12 | 1 | 26  | 16.1  | 42   | 96.3 | 59.1  | 76.2 |
| P10124 | 0.0000E+00 | 20.8861 | 1 | 2  | 2 | 3   | 17.6  | 42.5 | 32.8 | 47.1  | 39.8 |
| Q99715 | 6.0000E-03 | 0.9794  | 1 | 2  | 2 | 2   | 332.9 | 42.8 | 48.9 | 46    | 43.4 |
| P20742 | 0.0000E+00 | 11.7409 | 1 | 16 | 6 | 119 | 163.8 | 42.9 | 63.9 | 103.2 | 48.5 |
| P17813 | 0.0000E+00 | 4.2553  | 1 | 2  | 2 | 2   | 70.5  | 42.9 | 50.8 | 49.8  | 79.4 |
| P33151 | 6.0000E-03 | 2.0408  | 1 | 1  | 1 | 1   | 87.5  | 43.1 | 62   | 59.5  | 61.3 |
| P07602 | 3.0000E-03 | 2.8626  | 1 | 1  | 1 | 1   | 58.1  | 43.2 | 42.9 | 40.6  | 39.1 |
| P00746 | 0.0000E+00 | 33.2016 | 1 | 5  | 5 | 6   | 27    | 43.4 | 55.3 | 53.1  | 64   |
| Q8N6C8 | 0.0000E+00 | 17.7677 | 1 | 6  | 6 | 8   | 47.4  | 43.6 | 94.3 | 97    | 54.4 |
| Q14956 | 6.0000E-03 | 1.5734  | 1 | 1  | 1 | 2   | 63.9  | 44.3 | 68.8 | 57.8  | 71.8 |
| O15394 | 0.0000E+00 | 6.2127  | 1 | 4  | 4 | 4   | 93    | 44.9 | 41.4 | 47.4  | 47.6 |
| P62937 | 0.0000E+00 | 15.1515 | 1 | 3  | 3 | 3   | 18    | 45.3 | 56   | 64.7  | 75.1 |



|        |            |         |   |   |   |    |       |      |      |       |      |
|--------|------------|---------|---|---|---|----|-------|------|------|-------|------|
| P63104 | 0.0000E+00 | 41.6327 | 1 | 7 | 6 | 9  | 27.7  | 46.7 | 36   | 51.5  | 51.6 |
| P07339 | 0.0000E+00 | 14.3204 | 1 | 4 | 4 | 5  | 44.5  | 47   | 41.8 | 44.6  | 43.1 |
| Q15848 | 0.0000E+00 | 29.5082 | 1 | 4 | 4 | 10 | 26.4  | 47.6 | 59.8 | 61.4  | 70.6 |
| P14625 | 0.0000E+00 | 3.1133  | 1 | 2 | 2 | 2  | 92.4  | 47.8 | 42.1 | 49.9  | 49.8 |
| P20023 | 3.0000E-03 | 2.8074  | 1 | 3 | 3 | 3  | 112.8 | 48.2 | 64.7 | 43.8  | 55.6 |
| P13942 | 6.0000E-03 | 0.9217  | 1 | 1 | 1 | 1  | 171.7 | 48.7 | 31.3 | 21.6  | 31.7 |
| P23142 | 0.0000E+00 | 6.4011  | 1 | 3 | 3 | 3  | 77.2  | 49.2 | 52   | 57.8  | 51.1 |
| P05062 | 0.0000E+00 | 12.9121 | 1 | 4 | 3 | 4  | 39.4  | 49.6 | 36.7 | 61.3  | 42   |
| Q13740 | 0.0000E+00 | 8.0617  | 1 | 4 | 4 | 4  | 65.1  | 49.9 | 58.4 | 58    | 60.6 |
| P30043 | 0.0000E+00 | 23.7864 | 1 | 3 | 3 | 4  | 22.1  | 50.1 | 68.7 | 65.8  | 84.7 |
| P08519 | 0.0000E+00 | 16.3369 | 1 | 6 | 6 | 7  | 501   | 50.3 | 56.3 | 174.6 | 60.7 |
| P21333 | 0.0000E+00 | 2.4556  | 1 | 6 | 6 | 6  | 280.6 | 50.3 | 51.7 | 74.9  | 72.2 |
| P22891 | 0.0000E+00 | 9.7500  | 1 | 4 | 4 | 5  | 44.7  | 50.3 | 49.6 | 49.2  | 52.8 |
| P06753 | 3.0000E-03 | 9.4737  | 1 | 3 | 2 | 3  | 32.9  | 50.7 | 44.3 | 49.8  | 44.7 |
| Q12841 | 0.0000E+00 | 11.6883 | 1 | 3 | 3 | 3  | 35    | 51.8 | 54.9 | 50.8  | 52.6 |
| Q6YHK3 | 0.0000E+00 | 2.8374  | 1 | 4 | 4 | 5  | 161.6 | 52   | 64.5 | 64.5  | 69.9 |
| P07737 | 0.0000E+00 | 27.1429 | 1 | 3 | 3 | 3  | 15    | 52   | 48.2 | 54.3  | 50.2 |
| P11717 | 0.0000E+00 | 2.3685  | 1 | 5 | 5 | 5  | 274.2 | 52.8 | 53.1 | 63.8  | 60.9 |
| P01859 | 0.0000E+00 | 25.4601 | 1 | 6 | 3 | 10 | 35.9  | 53.1 | 44.9 | 49.8  | 40.7 |
| P16112 | 0.0000E+00 | 1.2008  | 1 | 2 | 2 | 2  | 250   | 53.7 | 76.5 | 66.8  | 76.4 |
| P62805 | 6.0000E-03 | 9.7087  | 1 | 1 | 1 | 1  | 11.4  | 54   | 59.2 | 105.9 | 56.5 |
| P23470 | 3.0000E-03 | 1.5225  | 1 | 2 | 2 | 2  | 161.9 | 54.4 | 57.8 | 50.5  | 56.3 |

|        |            |         |   |    |    |    |       |      |      |       |       |
|--------|------------|---------|---|----|----|----|-------|------|------|-------|-------|
| P04179 | 6.0000E-03 | 3.6036  | 1 | 1  | 1  | 1  | 24.7  | 55.7 | 34.4 | 57.8  | 42    |
| Q9Y4L1 | 0.0000E+00 | 4.4044  | 1 | 3  | 3  | 4  | 111.3 | 56   | 56.9 | 55.9  | 49.5  |
| P36980 | 0.0000E+00 | 18.5185 | 1 | 5  | 4  | 11 | 30.6  | 56.5 | 85.1 | 96.6  | 80.2  |
| P60174 | 6.0000E-03 | 8.7413  | 1 | 2  | 2  | 2  | 30.8  | 56.9 | 91.6 | 70.5  | 88.1  |
| P01860 | 0.0000E+00 | 29.1777 | 1 | 7  | 2  | 16 | 41.3  | 57.4 | 43.8 | 53.2  | 37.9  |
| P27487 | 0.0000E+00 | 10.4439 | 1 | 7  | 7  | 8  | 88.2  | 57.5 | 66   | 60.7  | 63.9  |
| Q12805 | 0.0000E+00 | 11.5619 | 1 | 5  | 5  | 5  | 54.6  | 58.8 | 63.7 | 78.2  | 75.1  |
| Q9NPY3 | 0.0000E+00 | 4.4479  | 1 | 2  | 2  | 2  | 68.5  | 59   | 69.2 | 52.3  | 70.8  |
| P0DJ19 | 0.0000E+00 | 63.9344 | 1 | 9  | 3  | 50 | 13.5  | 59.3 | 94.6 | 45.1  | 41.2  |
| P12111 | 0.0000E+00 | 4.2493  | 1 | 11 | 11 | 11 | 343.5 | 60   | 69.4 | 65.7  | 75.8  |
| Q76LX8 | 0.0000E+00 | 2.2425  | 1 | 3  | 3  | 3  | 153.5 | 60.2 | 83.1 | 87.6  | 112.1 |
| P01033 | 0.0000E+00 | 14.9758 | 1 | 2  | 2  | 3  | 23.2  | 60.5 | 42   | 53.5  | 42.9  |
| Q99784 | 0.0000E+00 | 8.6598  | 1 | 4  | 4  | 8  | 55.3  | 60.8 | 64.9 | 70.5  | 85.3  |
| Q9UNW1 | 0.0000E+00 | 11.0883 | 1 | 4  | 4  | 4  | 55    | 62.1 | 71.6 | 62    | 68.6  |
| P43121 | 5.0000E-03 | 4.9536  | 1 | 2  | 2  | 2  | 71.6  | 62.8 | 71.2 | 64.8  | 68.8  |
| Q12913 | 0.0000E+00 | 6.0583  | 1 | 6  | 6  | 8  | 145.9 | 63   | 74.8 | 68.5  | 79.8  |
| Q13822 | 0.0000E+00 | 7.6477  | 1 | 6  | 6  | 8  | 98.9  | 63.5 | 58.3 | 71.1  | 72.7  |
| P24043 | 8.0000E-03 | 0.5766  | 1 | 2  | 2  | 2  | 343.7 | 64.4 | 59.7 | 62.4  | 64.5  |
| P20848 | 6.0000E-03 | 3.3333  | 1 | 2  | 1  | 25 | 47.9  | 64.5 | 23.3 | 111.8 | 28.4  |
| P35555 | 0.0000E+00 | 1.8112  | 1 | 4  | 4  | 4  | 312   | 64.8 | 66.3 | 64.6  | 77.3  |
| P00390 | 5.0000E-03 | 3.6398  | 1 | 2  | 2  | 2  | 56.2  | 65.3 | 90.2 | 79.6  | 82.8  |
| Q92496 | 0.0000E+00 | 5.7093  | 1 | 3  | 3  | 3  | 65.3  | 65.4 | 62.7 | 74.3  | 72.8  |

|        |            |         |   |    |    |    |       |      |      |      |       |
|--------|------------|---------|---|----|----|----|-------|------|------|------|-------|
| Q86Y46 | 6.0000E-03 | 3.8889  | 1 | 2  | 1  | 2  | 58.9  | 65.4 | 59   | 77.6 | 56.9  |
| P49747 | 0.0000E+00 | 29.0621 | 1 | 14 | 11 | 21 | 82.8  | 66.5 | 72.6 | 76.7 | 99.9  |
| P00338 | 0.0000E+00 | 18.9759 | 1 | 6  | 5  | 6  | 36.7  | 66.8 | 89.6 | 87.7 | 95.9  |
| Q6UX71 | 3.0000E-03 | 5.2930  | 1 | 3  | 3  | 3  | 59.5  | 66.8 | 66.4 | 65.6 | 66.1  |
| P61769 | 0.0000E+00 | 35.2941 | 1 | 3  | 3  | 6  | 13.7  | 66.9 | 69   | 55.3 | 81.2  |
| Q14314 | 3.0000E-03 | 3.4169  | 1 | 2  | 2  | 2  | 50.2  | 66.9 | 95.3 | 85.2 | 81.3  |
| Q9UHG3 | 3.0000E-03 | 4.7525  | 1 | 3  | 3  | 3  | 56.6  | 67.1 | 65.2 | 97.4 | 64.4  |
| P13598 | 0.0000E+00 | 11.6364 | 1 | 3  | 3  | 5  | 30.6  | 67.4 | 95.5 | 89.9 | 97.8  |
| P04220 | 0.0000E+00 | 46.0358 | 1 | 12 | 1  | 39 | 43    | 68.5 | 31   | 40.2 | 29.4  |
| Q9BY67 | 0.0000E+00 | 10.1810 | 1 | 3  | 3  | 3  | 48.5  | 70.4 | 65.8 | 81.3 | 65    |
| P01765 | 0.0000E+00 | 26.0870 | 1 | 2  | 2  | 2  | 12.3  | 70.9 | 52.8 | 54.4 | 54.8  |
| Q14515 | 0.0000E+00 | 5.2711  | 1 | 3  | 3  | 4  | 75.2  | 71.4 | 95.7 | 83.6 | 98.4  |
| O00533 | 0.0000E+00 | 9.9338  | 1 | 9  | 9  | 11 | 135   | 71.5 | 88   | 76.9 | 81    |
| Q13103 | 0.0000E+00 | 26.5403 | 1 | 5  | 5  | 12 | 24.3  | 72.4 | 70.4 | 73   | 95.6  |
| P00748 | 0.0000E+00 | 11.8699 | 1 | 5  | 5  | 7  | 67.7  | 72.4 | 73.3 | 86   | 79.3  |
| P62979 | 0.0000E+00 | 16.0256 | 1 | 2  | 2  | 4  | 18    | 72.8 | 95.3 | 94.9 | 136.8 |
| P13647 | 0.0000E+00 | 16.2712 | 1 | 10 | 5  | 10 | 62.3  | 73.1 | 68.2 | 89.7 | 61.1  |
| P09960 | 0.0000E+00 | 9.1653  | 1 | 6  | 6  | 6  | 69.2  | 73.1 | 70.1 | 78.4 | 68.8  |
| P05556 | 3.0000E-03 | 3.7594  | 1 | 3  | 3  | 3  | 88.4  | 73.3 | 94.8 | 92.3 | 104.5 |
| Q9ULI3 | 3.0000E-03 | 2.3172  | 1 | 3  | 3  | 4  | 147.4 | 73.4 | 92.6 | 83.9 | 98.1  |
| Q6UXB8 | 0.0000E+00 | 23.7581 | 1 | 8  | 8  | 16 | 49.4  | 73.5 | 88.5 | 81.4 | 111.9 |
| Q13790 | 0.0000E+00 | 11.6564 | 1 | 3  | 3  | 9  | 35.4  | 73.8 | 57.6 | 92.1 | 59.4  |

|        |            |         |   |    |    |    |       |      |       |       |       |
|--------|------------|---------|---|----|----|----|-------|------|-------|-------|-------|
| Q12860 | 0.0000E+00 | 4.9116  | 1 | 4  | 4  | 4  | 113.2 | 74.3 | 100.8 | 82    | 94.2  |
| Q99983 | 0.0000E+00 | 11.8765 | 1 | 5  | 5  | 6  | 49.5  | 74.8 | 89.3  | 77.1  | 86.8  |
| Q01459 | 3.0000E-03 | 7.7922  | 1 | 3  | 3  | 3  | 43.7  | 75.2 | 68.4  | 65.9  | 71.9  |
| Q7Z7G0 | 0.0000E+00 | 7.9070  | 1 | 6  | 6  | 7  | 118.6 | 75.3 | 81.8  | 81.7  | 88.2  |
| P04040 | 0.0000E+00 | 21.0626 | 1 | 9  | 9  | 13 | 59.7  | 77   | 108.2 | 92.2  | 129.7 |
| P27797 | 0.0000E+00 | 13.9089 | 1 | 5  | 5  | 5  | 48.1  | 77.5 | 73.6  | 91.9  | 90.7  |
| P07900 | 3.0000E-03 | 3.6885  | 1 | 3  | 3  | 3  | 84.6  | 79.9 | 91.7  | 102.2 | 105.9 |
| P01598 | 0.0000E+00 | 26.8519 | 1 | 2  | 2  | 2  | 11.8  | 79.9 | 100.6 | 69.6  | 82.2  |
| Q6EMK4 | 0.0000E+00 | 15.1560 | 1 | 6  | 6  | 8  | 71.7  | 80.6 | 86.6  | 80.9  | 92.5  |
| P33908 | 3.0000E-03 | 3.9816  | 1 | 3  | 3  | 3  | 72.9  | 81   | 91.5  | 76.3  | 81.2  |
| P05362 | 0.0000E+00 | 17.4812 | 1 | 8  | 8  | 12 | 57.8  | 81.9 | 80.5  | 84.7  | 76.9  |
| P00918 | 0.0000E+00 | 30.3846 | 1 | 6  | 6  | 7  | 29.2  | 81.9 | 128.6 | 109.5 | 162.6 |
| P13727 | 0.0000E+00 | 27.4775 | 1 | 5  | 5  | 5  | 25.2  | 82.5 | 71.6  | 71.9  | 69    |
| P11279 | 3.0000E-03 | 4.0767  | 1 | 2  | 2  | 3  | 44.9  | 83   | 95.1  | 99.3  | 115.7 |
| P27918 | 0.0000E+00 | 23.8806 | 1 | 10 | 10 | 14 | 51.2  | 83.2 | 122.2 | 106.8 | 95.6  |
| P13591 | 0.0000E+00 | 17.2494 | 1 | 11 | 11 | 14 | 94.5  | 83.9 | 97.4  | 90.3  | 99.1  |
| P00558 | 5.0000E-03 | 4.3165  | 1 | 2  | 2  | 2  | 44.6  | 83.9 | 89.1  | 86.4  | 93.4  |
| P23284 | 6.0000E-03 | 6.0185  | 1 | 1  | 1  | 1  | 23.7  | 84.1 | 68.4  | 82.1  | 63.5  |
| P15151 | 0.0000E+00 | 9.8321  | 1 | 4  | 4  | 6  | 45.3  | 84.3 | 97.8  | 98.1  | 97.5  |
| P06703 | 0.0000E+00 | 27.7778 | 1 | 2  | 2  | 2  | 10.2  | 84.3 | 97    | 92.1  | 115.3 |
| P08637 | 3.0000E-03 | 7.4803  | 1 | 2  | 2  | 2  | 29.1  | 84.3 | 101.5 | 82.1  | 75.4  |
| P04066 | 0.0000E+00 | 6.2232  | 1 | 3  | 3  | 3  | 53.7  | 84.5 | 95.5  | 95.7  | 106.8 |

|        |            |         |   |    |    |    |       |      |       |       |       |
|--------|------------|---------|---|----|----|----|-------|------|-------|-------|-------|
| P05067 | 0.0000E+00 | 7.6623  | 1 | 6  | 6  | 6  | 86.9  | 84.9 | 75.1  | 93.2  | 82.1  |
| P14543 | 0.0000E+00 | 8.1796  | 1 | 10 | 10 | 11 | 136.3 | 85.1 | 89.1  | 91.9  | 97.7  |
| Q07954 | 0.0000E+00 | 2.1127  | 1 | 7  | 7  | 7  | 504.3 | 85.4 | 99    | 107.5 | 109.6 |
| P01344 | 0.0000E+00 | 13.8889 | 1 | 2  | 2  | 6  | 20.1  | 86.5 | 102.7 | 90.2  | 114   |
| O95479 | 3.0000E-03 | 4.0455  | 1 | 3  | 3  | 3  | 88.8  | 86.9 | 77.4  | 83.4  | 69.3  |
| Q8NBJ4 | 0.0000E+00 | 21.1970 | 1 | 7  | 7  | 8  | 45.3  | 88.9 | 100   | 78.5  | 87.9  |
| P17936 | 0.0000E+00 | 48.1100 | 1 | 11 | 11 | 18 | 31.7  | 89.4 | 125   | 100.1 | 135.1 |
| P14780 | 0.0000E+00 | 14.1443 | 1 | 7  | 7  | 7  | 78.4  | 89.4 | 63.2  | 75.8  | 60.8  |
| P12830 | 0.0000E+00 | 4.9887  | 1 | 3  | 3  | 4  | 97.4  | 89.6 | 99.7  | 89.3  | 86    |
| P10721 | 0.0000E+00 | 4.2008  | 1 | 4  | 4  | 5  | 109.8 | 89.8 | 109.6 | 73.4  | 95.7  |
| P49908 | 0.0000E+00 | 14.6982 | 1 | 7  | 7  | 14 | 43.2  | 90.7 | 92.5  | 100.1 | 114.6 |
| Q03591 | 0.0000E+00 | 20.9091 | 1 | 8  | 1  | 22 | 37.6  | 91   | 78    | 94.7  | 83.1  |
| P55058 | 0.0000E+00 | 16.6329 | 1 | 6  | 6  | 10 | 54.7  | 92.2 | 89.1  | 120.1 | 106.6 |
| P07359 | 0.0000E+00 | 10.7362 | 1 | 6  | 6  | 8  | 71.5  | 93.6 | 122.6 | 113.7 | 122.2 |
| P18206 | 0.0000E+00 | 6.5256  | 1 | 8  | 8  | 8  | 123.7 | 94.2 | 93.6  | 105.4 | 100   |
| P15144 | 0.0000E+00 | 8.9969  | 1 | 8  | 8  | 9  | 109.5 | 94.9 | 86    | 103.8 | 82    |
| P04070 | 0.0000E+00 | 19.9566 | 1 | 8  | 8  | 13 | 52    | 95.6 | 104.5 | 128   | 107.1 |
| P35908 | 0.0000E+00 | 17.5274 | 1 | 10 | 6  | 12 | 65.4  | 97.3 | 72.4  | 74.6  | 63.1  |
| Q9BXR6 | 0.0000E+00 | 3.8664  | 1 | 2  | 1  | 3  | 64.4  | 98.2 | 67.6  | 94.7  | 62.3  |
| Q15063 | 0.0000E+00 | 12.0813 | 1 | 7  | 7  | 8  | 93.3  | 98.7 | 95    | 107.6 | 106   |
| Q5T619 | 6.0000E-03 | 2.1127  | 1 | 1  | 1  | 11 | 62.3  | 99   | 132.8 | 133.4 | 176.7 |
| P09486 | 0.0000E+00 | 38.9439 | 1 | 10 | 10 | 15 | 34.6  | 99.3 | 85.4  | 98.7  | 85.7  |

|        |            |         |   |    |    |    |       |       |       |       |       |
|--------|------------|---------|---|----|----|----|-------|-------|-------|-------|-------|
| P01766 | 0.0000E+00 | 25.0000 | 1 | 2  | 2  | 5  | 13.2  | 99.6  | 74.5  | 73.8  | 56.1  |
| P40197 | 0.0000E+00 | 9.4643  | 1 | 5  | 5  | 6  | 60.9  | 101.2 | 98.1  | 119.2 | 102   |
| P12955 | 0.0000E+00 | 8.9249  | 1 | 5  | 5  | 6  | 54.5  | 102.2 | 123.1 | 100.4 | 108.9 |
| P16070 | 0.0000E+00 | 5.2561  | 1 | 4  | 4  | 9  | 81.5  | 102.3 | 127.6 | 127.3 | 116.1 |
| P02042 | 0.0000E+00 | 93.8776 | 1 | 14 | 7  | 85 | 16    | 102.4 | 139.2 | 141.1 | 176.8 |
| O43505 | 5.0000E-03 | 6.0241  | 1 | 2  | 2  | 2  | 47.1  | 103.2 | 115.4 | 98.4  | 118.7 |
| P80188 | 6.0000E-03 | 5.5556  | 1 | 1  | 1  | 2  | 22.6  | 103.9 | 89.6  | 89.4  | 55    |
| Q9BTY2 | 0.0000E+00 | 7.4946  | 1 | 4  | 4  | 4  | 54    | 106.8 | 124.8 | 122.3 | 152.7 |
| P11021 | 0.0000E+00 | 27.8287 | 1 | 14 | 12 | 15 | 72.3  | 107.1 | 88.7  | 139.5 | 104.9 |
| O00187 | 0.0000E+00 | 20.1166 | 1 | 11 | 11 | 18 | 75.7  | 109.1 | 108.6 | 115.5 | 113.3 |
| P35443 | 0.0000E+00 | 12.6951 | 1 | 8  | 5  | 9  | 105.8 | 110.4 | 141.6 | 145.1 | 174.9 |
| B9A064 | 0.0000E+00 | 40.6542 | 1 | 6  | 3  | 11 | 23    | 111.3 | 108.4 | 97.9  | 79.7  |
| P32119 | 0.0000E+00 | 37.3737 | 1 | 8  | 8  | 19 | 21.9  | 114.9 | 174.4 | 138.2 | 240.7 |
| P13473 | 5.0000E-03 | 2.9268  | 1 | 1  | 1  | 1  | 44.9  | 116.4 | 126.1 | 117.9 | 136.4 |
| P02656 | 0.0000E+00 | 37.3737 | 1 | 4  | 4  | 12 | 10.8  | 118.2 | 94.6  | 119.4 | 116.4 |
| P00915 | 0.0000E+00 | 36.7816 | 1 | 8  | 8  | 21 | 28.9  | 118.8 | 206.6 | 165.6 | 244.5 |
| P06733 | 0.0000E+00 | 19.8157 | 1 | 6  | 6  | 7  | 47.1  | 120.4 | 132   | 118.9 | 130.9 |
| P04406 | 0.0000E+00 | 15.8209 | 1 | 5  | 5  | 6  | 36    | 121.3 | 170.2 | 168.4 | 181.7 |
| P14618 | 6.0000E-03 | 3.3898  | 1 | 2  | 2  | 2  | 57.9  | 121.7 | 140.2 | 153.9 | 149.1 |
| Q16853 | 5.0000E-03 | 3.5387  | 1 | 3  | 3  | 3  | 84.6  | 121.9 | 157.7 | 127   | 158.9 |
| P02746 | 0.0000E+00 | 36.3636 | 1 | 8  | 8  | 27 | 26.7  | 122.1 | 169.6 | 184.2 | 164.5 |
| P60709 | 0.0000E+00 | 46.1333 | 1 | 12 | 5  | 30 | 41.7  | 122.6 | 109   | 137.8 | 116.7 |

|        |            |         |   |    |    |    |       |       |       |       |       |
|--------|------------|---------|---|----|----|----|-------|-------|-------|-------|-------|
| P05452 | 0.0000E+00 | 48.5149 | 1 | 8  | 8  | 19 | 22.5  | 122.8 | 143.5 | 152.9 | 163   |
| Q9NPH3 | 3.0000E-03 | 2.8070  | 1 | 2  | 2  | 3  | 65.4  | 124.9 | 130.7 | 125.7 | 138.7 |
| P11226 | 0.0000E+00 | 34.6774 | 1 | 8  | 8  | 16 | 26.1  | 126.9 | 88.9  | 167.5 | 109.4 |
| P48740 | 0.0000E+00 | 26.7525 | 1 | 14 | 13 | 25 | 79.2  | 127.2 | 142.3 | 154.8 | 166.1 |
| P04180 | 0.0000E+00 | 17.0455 | 1 | 5  | 5  | 8  | 49.5  | 127.6 | 160.5 | 149.6 | 148.6 |
| Q96PD5 | 0.0000E+00 | 34.0278 | 1 | 12 | 12 | 36 | 62.2  | 127.9 | 172.8 | 159.7 | 217.9 |
| P01857 | 0.0000E+00 | 53.0303 | 1 | 12 | 6  | 32 | 36.1  | 128.1 | 119.4 | 115.6 | 99.7  |
| Q9UGM5 | 0.0000E+00 | 38.2199 | 1 | 12 | 12 | 19 | 42    | 128.1 | 143.9 | 138.2 | 144.2 |
| Q9UNN8 | 0.0000E+00 | 13.4454 | 1 | 3  | 3  | 3  | 26.7  | 128.8 | 148.2 | 145.3 | 131.6 |
| P02751 | 0.0000E+00 | 11.0226 | 1 | 21 | 21 | 27 | 262.5 | 129.7 | 132   | 155.1 | 140.6 |
| P01834 | 0.0000E+00 | 65.0943 | 1 | 4  | 4  | 12 | 11.6  | 129.9 | 95    | 93.8  | 67.5  |
| Q9NQ79 | 0.0000E+00 | 7.4130  | 1 | 4  | 4  | 5  | 71.4  | 130.4 | 171.7 | 131.6 | 143.8 |
| Q9NZP8 | 0.0000E+00 | 32.6489 | 1 | 10 | 8  | 29 | 53.5  | 130.6 | 136.5 | 140.3 | 141.8 |
| P05109 | 0.0000E+00 | 40.8602 | 1 | 5  | 5  | 7  | 10.8  | 131.7 | 73.4  | 110.2 | 47.4  |
| P22105 | 0.0000E+00 | 6.4828  | 1 | 20 | 20 | 23 | 457.9 | 135.3 | 154.7 | 147.6 | 164.1 |
| O14791 | 0.0000E+00 | 39.9497 | 1 | 13 | 13 | 18 | 43.9  | 135.8 | 146.5 | 138.3 | 171.2 |
| P01591 | 0.0000E+00 | 25.7862 | 1 | 4  | 4  | 4  | 18.1  | 139.4 | 99.8  | 98.8  | 79.9  |
| P00740 | 0.0000E+00 | 29.2842 | 1 | 11 | 11 | 22 | 51.7  | 140.1 | 112.4 | 141.4 | 116.8 |
| Q9Y5Y7 | 0.0000E+00 | 12.7329 | 1 | 4  | 4  | 10 | 35.2  | 141.4 | 171.3 | 192.8 | 188.5 |
| P0CG05 | 0.0000E+00 | 81.1321 | 1 | 6  | 3  | 13 | 11.3  | 141.5 | 137.9 | 118.4 | 121.3 |
| O43866 | 0.0000E+00 | 27.0893 | 1 | 7  | 7  | 10 | 38.1  | 142.8 | 85.2  | 72.8  | 64.1  |
| P43251 | 0.0000E+00 | 27.9926 | 1 | 12 | 12 | 20 | 61.1  | 143.9 | 171.3 | 162.8 | 173.2 |

|        |            |         |   |    |    |    |       |       |       |       |       |
|--------|------------|---------|---|----|----|----|-------|-------|-------|-------|-------|
| P24821 | 0.0000E+00 | 8.9050  | 1 | 13 | 13 | 14 | 240.7 | 143.9 | 144.8 | 145.6 | 157.7 |
| Q9UBR2 | 3.0000E-03 | 7.2607  | 1 | 2  | 2  | 2  | 33.8  | 144.5 | 133.9 | 121   | 102.4 |
| P02747 | 0.0000E+00 | 34.6939 | 1 | 6  | 6  | 33 | 25.8  | 146.4 | 189.5 | 196.5 | 188.1 |
| O95445 | 0.0000E+00 | 42.5532 | 1 | 9  | 9  | 14 | 21.2  | 146.8 | 153.8 | 144.8 | 155.7 |
| P20851 | 0.0000E+00 | 51.1905 | 1 | 10 | 10 | 20 | 28.3  | 147.2 | 138.5 | 164.6 | 139.2 |
| P80108 | 0.0000E+00 | 18.0952 | 1 | 14 | 14 | 23 | 92.3  | 147.4 | 176.5 | 178.9 | 211.2 |
| Q15485 | 0.0000E+00 | 29.3930 | 1 | 8  | 8  | 17 | 34    | 147.8 | 134   | 150.3 | 142.3 |
| P02776 | 0.0000E+00 | 35.6436 | 1 | 4  | 4  | 6  | 10.8  | 147.8 | 137.2 | 180.3 | 150.6 |
| Q86VB7 | 0.0000E+00 | 15.2249 | 1 | 13 | 13 | 16 | 125.4 | 148.6 | 157.3 | 166   | 129   |
| P05154 | 0.0000E+00 | 20.6897 | 1 | 8  | 8  | 10 | 45.6  | 149.3 | 150.4 | 145.9 | 178.1 |
| P02753 | 0.0000E+00 | 60.6965 | 1 | 8  | 8  | 18 | 23    | 152.4 | 165.1 | 145.2 | 220.1 |
| Q96KN2 | 0.0000E+00 | 37.0809 | 1 | 15 | 15 | 21 | 56.7  | 152.9 | 246.5 | 150   | 165.7 |
| P26927 | 0.0000E+00 | 30.5204 | 1 | 18 | 18 | 27 | 80.3  | 153.7 | 148.9 | 162.3 | 163.6 |
| O00391 | 0.0000E+00 | 22.7577 | 1 | 16 | 16 | 20 | 82.5  | 154.8 | 160.5 | 170.6 | 163.3 |
| Q92820 | 0.0000E+00 | 21.0692 | 1 | 6  | 6  | 12 | 35.9  | 155.2 | 153   | 159.6 | 165.8 |
| Q04756 | 0.0000E+00 | 23.8168 | 1 | 13 | 13 | 26 | 70.6  | 165.2 | 212.1 | 202.1 | 218   |
| P07333 | 0.0000E+00 | 6.8930  | 1 | 6  | 6  | 8  | 107.9 | 165.8 | 197.1 | 209.8 | 188.7 |
| P14151 | 0.0000E+00 | 19.0860 | 1 | 6  | 6  | 14 | 42.2  | 166.5 | 211.3 | 162.6 | 183.6 |
| P80748 | 5.0000E-03 | 7.2072  | 1 | 1  | 1  | 2  | 11.9  | 168.5 | 253.6 | 140   | 121.8 |
| P22352 | 0.0000E+00 | 32.3009 | 1 | 6  | 6  | 11 | 25.5  | 168.7 | 161.2 | 213.8 | 159.2 |
| P06702 | 0.0000E+00 | 66.6667 | 1 | 8  | 8  | 13 | 13.2  | 168.9 | 97.2  | 122.4 | 70.4  |
| P03951 | 0.0000E+00 | 34.0800 | 1 | 19 | 19 | 25 | 70.1  | 169.3 | 133.1 | 191.6 | 141.8 |



|        |            |         |   |     |    |     |       |       |       |       |       |
|--------|------------|---------|---|-----|----|-----|-------|-------|-------|-------|-------|
| P04278 | 0.0000E+00 | 46.5174 | 1 | 12  | 12 | 26  | 43.8  | 171.2 | 205   | 204.7 | 241.2 |
| P04075 | 0.0000E+00 | 20.3297 | 1 | 7   | 6  | 8   | 39.4  | 172.4 | 191.8 | 214.1 | 215   |
| P02745 | 0.0000E+00 | 28.5714 | 1 | 5   | 5  | 15  | 26    | 172.6 | 225.8 | 232   | 211.3 |
| P02671 | 0.0000E+00 | 10.9700 | 1 | 7   | 7  | 9   | 94.9  | 179.1 | 148.3 | 278.2 | 146.8 |
| P0C0L4 | 0.0000E+00 | 67.7179 | 1 | 102 | 4  | 862 | 192.7 | 180.1 | 242.7 | 243.6 | 296.2 |
| P13645 | 0.0000E+00 | 31.1644 | 1 | 18  | 14 | 27  | 58.8  | 186.6 | 129.9 | 157.7 | 127.6 |
| P35527 | 0.0000E+00 | 44.1413 | 1 | 20  | 19 | 45  | 62    | 189.7 | 199.7 | 286.4 | 186.7 |
| P80511 | 0.0000E+00 | 9.7826  | 2 | 3   | 2  | 1   | 10.6  | 192.6 | 60.3  | 82.1  | 65.1  |
| Q13085 | 6.0000E-03 | 0.2984  | 1 | 1   | 1  | 4   | 265.4 | 196.6 | 170.6 | 258.1 | 172.7 |
| Q9UK55 | 0.0000E+00 | 36.7117 | 1 | 14  | 14 | 18  | 50.7  | 197.1 | 175.6 | 173.8 | 144.9 |
| P55056 | 0.0000E+00 | 39.3701 | 1 | 6   | 6  | 12  | 14.5  | 197.6 | 171.7 | 241.8 | 178.2 |
| P04264 | 0.0000E+00 | 46.8944 | 1 | 24  | 23 | 40  | 66    | 200.9 | 207.3 | 296.6 | 176.8 |
| P62328 | 0.0000E+00 | 40.9091 | 1 | 2   | 1  | 5   | 5.1   | 201.4 | 187.7 | 247.3 | 198.5 |
| P02655 | 0.0000E+00 | 49.5050 | 1 | 4   | 4  | 12  | 11.3  | 202.1 | 122.6 | 160.7 | 165.5 |
| P13796 | 0.0000E+00 | 36.6826 | 1 | 19  | 19 | 24  | 70.2  | 208.4 | 173.4 | 220   | 175.3 |
| Q15582 | 0.0000E+00 | 24.3045 | 1 | 14  | 14 | 22  | 74.6  | 213.5 | 177.5 | 245.7 | 217.4 |
| P01876 | 0.0000E+00 | 37.3938 | 1 | 9   | 9  | 12  | 37.6  | 216.8 | 167.9 | 181.1 | 119.1 |
| Q8TAQ9 | 6.0000E-03 | 1.9608  | 1 | 1   | 1  | 4   | 40.5  | 218   | 185   | 252.1 | 187.3 |
| P15169 | 0.0000E+00 | 41.9214 | 1 | 12  | 12 | 38  | 52.3  | 223.8 | 213.1 | 221.6 | 232.9 |
| P15311 | 6.0000E-03 | 2.7304  | 1 | 2   | 2  | 2   | 69.4  | 224.3 | 265.5 | 278.9 | 270.6 |
| P08571 | 0.0000E+00 | 41.3333 | 1 | 14  | 14 | 16  | 40.1  | 230.1 | 258.5 | 248.7 | 238.8 |
| P02775 | 0.0000E+00 | 44.5313 | 1 | 7   | 7  | 35  | 13.9  | 231.2 | 193.4 | 253.6 | 227.2 |

|        |            |         |   |     |    |     |       |       |       |       |       |
|--------|------------|---------|---|-----|----|-----|-------|-------|-------|-------|-------|
| Q16610 | 0.0000E+00 | 51.6667 | 1 | 20  | 20 | 30  | 60.6  | 236.9 | 247.4 | 204.1 | 223.4 |
| P27169 | 0.0000E+00 | 43.9437 | 1 | 11  | 9  | 28  | 39.7  | 239.4 | 268.3 | 265.7 | 269.3 |
| P00742 | 0.0000E+00 | 33.6066 | 1 | 15  | 15 | 42  | 54.7  | 240.1 | 249.7 | 295.4 | 280.5 |
| P06276 | 0.0000E+00 | 33.2226 | 1 | 18  | 18 | 38  | 68.4  | 241.7 | 344.9 | 268.4 | 300.3 |
| P61626 | 0.0000E+00 | 18.9189 | 1 | 3   | 3  | 5   | 16.5  | 246.3 | 221.2 | 217.9 | 240.2 |
| O75636 | 0.0000E+00 | 36.1204 | 1 | 10  | 10 | 32  | 32.9  | 253.5 | 251.9 | 253.5 | 240.9 |
| Q92954 | 0.0000E+00 | 12.7493 | 1 | 17  | 17 | 24  | 151   | 254.3 | 283.6 | 325.3 | 299.1 |
| P05090 | 0.0000E+00 | 22.7513 | 1 | 5   | 5  | 21  | 21.3  | 256.6 | 232.4 | 269.7 | 242.9 |
| P35542 | 0.0000E+00 | 45.3846 | 1 | 7   | 7  | 28  | 14.7  | 258.6 | 271.4 | 286.3 | 306.1 |
| P10909 | 0.0000E+00 | 29.3987 | 1 | 13  | 13 | 49  | 52.5  | 262.3 | 248.9 | 389.7 | 311.4 |
| P01871 | 0.0000E+00 | 48.0088 | 1 | 18  | 7  | 52  | 49.3  | 268.3 | 172.1 | 150.7 | 135.6 |
| P35858 | 0.0000E+00 | 42.4793 | 1 | 20  | 20 | 51  | 66    | 270.1 | 442.2 | 347.4 | 490.4 |
| P0C0L5 | 0.0000E+00 | 68.0619 | 1 | 103 | 5  | 896 | 192.6 | 282.3 | 390.7 | 344   | 410.5 |
| P12259 | 0.0000E+00 | 16.0971 | 1 | 34  | 34 | 47  | 251.5 | 282.8 | 275.9 | 312.8 | 295.9 |
| Q14520 | 0.0000E+00 | 35.1786 | 1 | 14  | 14 | 39  | 62.6  | 287.1 | 249   | 300.3 | 281.9 |
| P54108 | 5.0000E-03 | 6.5306  | 1 | 2   | 2  | 3   | 27.6  | 296.3 | 330.5 | 325.4 | 276.8 |
| P02652 | 0.0000E+00 | 69.0000 | 1 | 8   | 8  | 79  | 11.2  | 302.1 | 468.7 | 304.8 | 476.9 |
| P02654 | 0.0000E+00 | 32.5301 | 1 | 4   | 4  | 14  | 9.3   | 306.8 | 287.6 | 309.2 | 324.6 |
| P29622 | 0.0000E+00 | 50.5855 | 1 | 17  | 17 | 39  | 48.5  | 308   | 351.3 | 396   | 464.3 |
| P00739 | 0.0000E+00 | 68.6782 | 1 | 22  | 8  | 483 | 39    | 312   | 220.6 | 274.2 | 186.4 |
| P07225 | 0.0000E+00 | 35.7988 | 1 | 19  | 19 | 58  | 75.1  | 319.6 | 275.1 | 361.6 | 283   |
| P0DJ18 | 0.0000E+00 | 72.1311 | 1 | 10  | 4  | 86  | 13.5  | 319.7 | 293.7 | 225   | 178.9 |

|        |            |         |   |    |    |     |       |       |       |       |       |
|--------|------------|---------|---|----|----|-----|-------|-------|-------|-------|-------|
| P68871 | 0.0000E+00 | 95.2381 | 1 | 16 | 9  | 157 | 16    | 326.8 | 490.9 | 474.8 | 651.7 |
| P02741 | 0.0000E+00 | 24.5536 | 1 | 6  | 6  | 27  | 25    | 328.2 | 164   | 336.4 | 172.2 |
| P07360 | 0.0000E+00 | 68.8119 | 1 | 10 | 10 | 66  | 22.3  | 335   | 320.5 | 335.9 | 316.5 |
| P07996 | 0.0000E+00 | 35.8120 | 1 | 32 | 32 | 58  | 129.3 | 336   | 301.3 | 378   | 389.3 |
| P18428 | 0.0000E+00 | 25.1559 | 1 | 9  | 9  | 13  | 53.4  | 337   | 230.4 | 352.1 | 193.6 |
| P19320 | 0.0000E+00 | 33.0176 | 1 | 20 | 20 | 28  | 81.2  | 342.2 | 293.8 | 338.3 | 338.9 |
| P02766 | 0.0000E+00 | 73.4694 | 1 | 12 | 12 | 125 | 15.9  | 355   | 460.4 | 381.8 | 510   |
| Q96IY4 | 0.0000E+00 | 34.9882 | 1 | 12 | 12 | 27  | 48.4  | 355.7 | 271.8 | 403   | 302.1 |
| P51884 | 0.0000E+00 | 40.8284 | 1 | 11 | 11 | 55  | 38.4  | 356.5 | 462.3 | 404.5 | 464.6 |
| O75882 | 0.0000E+00 | 26.3821 | 1 | 31 | 31 | 93  | 158.4 | 393.4 | 532.7 | 487.5 | 563.9 |
| P36955 | 0.0000E+00 | 37.3206 | 1 | 14 | 14 | 52  | 46.3  | 394.7 | 362.6 | 351   | 375.4 |
| P06681 | 0.0000E+00 | 38.4309 | 1 | 26 | 26 | 86  | 83.2  | 397.2 | 429   | 445.3 | 429.5 |
| Q08380 | 0.0000E+00 | 41.3675 | 1 | 21 | 21 | 95  | 65.3  | 411.2 | 620.4 | 442.9 | 497   |
| P02743 | 0.0000E+00 | 34.0807 | 1 | 9  | 9  | 62  | 25.4  | 427.4 | 436.7 | 466.8 | 397.2 |
| P07358 | 0.0000E+00 | 49.9154 | 1 | 24 | 24 | 83  | 67    | 434.9 | 433.7 | 438.4 | 448.1 |
| P03952 | 0.0000E+00 | 54.2320 | 1 | 31 | 31 | 82  | 71.3  | 464.6 | 508   | 526.3 | 534.5 |
| P06396 | 0.0000E+00 | 36.8286 | 1 | 26 | 26 | 74  | 85.6  | 469.2 | 534.1 | 489.6 | 582.1 |
| P05546 | 0.0000E+00 | 55.1102 | 1 | 22 | 22 | 79  | 57    | 488.8 | 502.1 | 643.8 | 615.5 |
| P09871 | 0.0000E+00 | 45.3488 | 1 | 23 | 22 | 89  | 76.6  | 489.6 | 472.9 | 497.1 | 483.1 |
| P02749 | 0.0000E+00 | 57.3913 | 1 | 14 | 14 | 89  | 38.3  | 491.1 | 399.7 | 422.1 | 395   |
| P08697 | 0.0000E+00 | 53.5642 | 1 | 22 | 22 | 80  | 54.5  | 498.6 | 506.2 | 507.5 | 529.9 |
| P01019 | 0.0000E+00 | 40.4124 | 1 | 15 | 15 | 77  | 53.1  | 501.9 | 434.8 | 550   | 492.9 |

|        |            |         |   |    |    |     |       |       |        |       |        |
|--------|------------|---------|---|----|----|-----|-------|-------|--------|-------|--------|
| P07357 | 0.0000E+00 | 45.8904 | 1 | 21 | 21 | 85  | 65.1  | 503   | 472.2  | 508.3 | 485.6  |
| P05543 | 0.0000E+00 | 40.0000 | 1 | 17 | 17 | 47  | 46.3  | 505.5 | 418.2  | 552.1 | 601.2  |
| P04196 | 0.0000E+00 | 35.6190 | 1 | 17 | 17 | 112 | 59.5  | 515.2 | 654.5  | 580   | 499.6  |
| P02787 | 0.0000E+00 | 64.6132 | 1 | 43 | 43 | 106 | 77    | 520.7 | 692.5  | 616.6 | 695.2  |
| P00734 | 0.0000E+00 | 59.9678 | 1 | 27 | 27 | 169 | 70    | 522.4 | 511.6  | 698.5 | 602.9  |
| P08185 | 0.0000E+00 | 50.8642 | 1 | 14 | 14 | 93  | 45.1  | 541.8 | 616.5  | 605.5 | 645.8  |
| P02748 | 0.0000E+00 | 46.3327 | 1 | 23 | 23 | 107 | 63.1  | 558   | 478.2  | 523.5 | 438.7  |
| P00736 | 0.0000E+00 | 51.0638 | 1 | 27 | 25 | 100 | 80.1  | 573.8 | 536.8  | 619.9 | 583.4  |
| P05156 | 0.0000E+00 | 45.1115 | 1 | 23 | 23 | 119 | 65.7  | 595.7 | 544.5  | 612.5 | 553.9  |
| P02760 | 0.0000E+00 | 43.7500 | 1 | 13 | 13 | 127 | 39    | 604.3 | 562.4  | 519.8 | 576.1  |
| P02649 | 0.0000E+00 | 71.6088 | 1 | 26 | 26 | 121 | 36.1  | 604.8 | 589.3  | 908   | 628.3  |
| P04004 | 0.0000E+00 | 43.0962 | 1 | 16 | 16 | 135 | 54.3  | 621.5 | 618    | 629.5 | 719.7  |
| P22792 | 0.0000E+00 | 45.5046 | 1 | 17 | 17 | 69  | 60.5  | 622.8 | 616.4  | 694.8 | 743    |
| P69905 | 0.0000E+00 | 95.0704 | 1 | 12 | 12 | 118 | 15.2  | 641.1 | 892.5  | 905.5 | 1095.5 |
| P10643 | 0.0000E+00 | 53.0249 | 1 | 34 | 33 | 136 | 93.5  | 642   | 573.7  | 680.7 | 710.2  |
| P02750 | 0.0000E+00 | 50.4323 | 1 | 13 | 13 | 78  | 38.2  | 642.9 | 469    | 560.7 | 401.3  |
| P13671 | 0.0000E+00 | 49.1435 | 1 | 40 | 40 | 114 | 104.7 | 667.3 | 718.1  | 781.1 | 749    |
| P43652 | 0.0000E+00 | 60.6010 | 1 | 34 | 34 | 120 | 69    | 703.8 | 991.9  | 848.5 | 1078.4 |
| P04275 | 0.0000E+00 | 32.5986 | 1 | 74 | 74 | 107 | 309.1 | 725.1 | 617    | 678.3 | 639.2  |
| Q06033 | 0.0000E+00 | 33.0337 | 1 | 25 | 25 | 119 | 99.8  | 767.6 | 558.1  | 718.6 | 562.9  |
| P19652 | 0.0000E+00 | 48.2587 | 1 | 11 | 8  | 193 | 23.6  | 770.8 | 399.5  | 718.3 | 525.4  |
| P02765 | 0.0000E+00 | 50.6812 | 1 | 12 | 12 | 190 | 39.3  | 777.2 | 1055.6 | 761   | 1017.1 |

|        |            |         |   |    |    |     |       |        |        |        |        |
|--------|------------|---------|---|----|----|-----|-------|--------|--------|--------|--------|
| P25311 | 0.0000E+00 | 55.7047 | 1 | 18 | 18 | 129 | 34.2  | 859.1  | 744.2  | 828.7  | 711.1  |
| P06727 | 0.0000E+00 | 75.5051 | 1 | 33 | 33 | 147 | 45.4  | 859.3  | 787.5  | 863.7  | 1009.7 |
| P01008 | 0.0000E+00 | 69.8276 | 1 | 34 | 34 | 180 | 52.6  | 880.9  | 827.7  | 883.8  | 1012.4 |
| P04003 | 0.0000E+00 | 67.8392 | 1 | 32 | 32 | 220 | 67    | 909.4  | 797.9  | 957.9  | 788.6  |
| P08603 | 0.0000E+00 | 45.7352 | 1 | 52 | 47 | 234 | 139   | 1007   | 897.6  | 1230   | 850.4  |
| P04217 | 0.0000E+00 | 61.6162 | 1 | 20 | 20 | 242 | 54.2  | 1072.3 | 1114.8 | 1226.2 | 1146.2 |
| P19827 | 0.0000E+00 | 43.0296 | 1 | 29 | 29 | 270 | 101.3 | 1201.1 | 1304.6 | 1217.9 | 1364.2 |
| P00747 | 0.0000E+00 | 64.6914 | 1 | 49 | 49 | 270 | 90.5  | 1221.5 | 1185.7 | 1411.5 | 1397.9 |
| P01042 | 0.0000E+00 | 43.1677 | 1 | 34 | 34 | 242 | 71.9  | 1297.8 | 1192.2 | 1317.3 | 1202.4 |
| P02768 | 0.0000E+00 | 80.4598 | 1 | 52 | 52 | 281 | 69.3  | 1324   | 1830.5 | 1398.6 | 1760.3 |
| P19823 | 0.0000E+00 | 52.6427 | 1 | 41 | 41 | 307 | 106.4 | 1328   | 1540.5 | 1414.8 | 1635.5 |
| Q14624 | 0.0000E+00 | 55.5914 | 1 | 45 | 45 | 275 | 103.3 | 1592.3 | 1302.3 | 1653.4 | 1342.6 |
| P01031 | 0.0000E+00 | 56.5036 | 1 | 81 | 81 | 295 | 188.2 | 1949   | 1704.2 | 2344.6 | 1753.5 |
| P05155 | 0.0000E+00 | 42.6000 | 1 | 23 | 23 | 336 | 55.1  | 1977.2 | 1850.8 | 2124.7 | 2058.3 |
| P02763 | 0.0000E+00 | 44.7761 | 1 | 10 | 7  | 394 | 23.5  | 1985.1 | 1090.8 | 1843.6 | 1054.8 |
| P02647 | 0.0000E+00 | 81.2734 | 1 | 29 | 29 | 394 | 30.8  | 2186.9 | 2700.9 | 2021.3 | 2545.5 |
| P00738 | 0.0000E+00 | 67.4877 | 1 | 30 | 16 | 883 | 45.2  | 2459.5 | 1605.7 | 2949.7 | 1757.5 |
| P00751 | 0.0000E+00 | 61.5183 | 1 | 44 | 44 | 438 | 85.5  | 2524.2 | 2462.1 | 2526.1 | 2343.2 |
| P02774 | 0.0000E+00 | 84.5992 | 1 | 39 | 39 | 623 | 52.9  | 2540.6 | 2942.1 | 2900.8 | 3048.1 |
| P02790 | 0.0000E+00 | 65.1515 | 1 | 27 | 27 | 563 | 51.6  | 2819   | 2829.7 | 2969.1 | 2954   |
| P00450 | 0.0000E+00 | 71.3615 | 1 | 60 | 60 | 682 | 122.1 | 3141.7 | 2827.9 | 3325.3 | 2821.6 |
| P01011 | 0.0000E+00 | 60.0473 | 1 | 26 | 26 | 664 | 47.6  | 3360.4 | 2267.6 | 3457   | 2375.5 |

|        |            |         |   |     |     |      |       |         |         |         |         |
|--------|------------|---------|---|-----|-----|------|-------|---------|---------|---------|---------|
| P01023 | 0.0000E+00 | 72.9308 | 1 | 87  | 77  | 1226 | 163.2 | 4758.6  | 5197    | 4866    | 5492    |
| P04114 | 0.0000E+00 | 62.0644 | 1 | 266 | 266 | 1117 | 515.3 | 6250    | 5361.2  | 7635.4  | 6046.7  |
| P01009 | 0.0000E+00 | 72.0096 | 1 | 41  | 40  | 1097 | 46.7  | 7345.9  | 3094.8  | 6742.2  | 3461.8  |
| P01024 | 0.0000E+00 | 85.8088 | 1 | 144 | 144 | 2515 | 187   | 12497.6 | 10821.6 | 12978.5 | 11242.9 |
